# Supplementary material for: Construction of a β-Ga2O3-based metal–oxide–semiconductor-structured photodiode for high-performance dual-mode solar-blind detector applications
Source: Royal Society of Chemistry journal article supplement (doi:10.1039/d0tc00100g), 2020-01-01
Supplement: d0tc00100g1.pdf [file d0tc00100g1.pdf]

## Associated content

\* Electronic Supporting Information (ESI†)

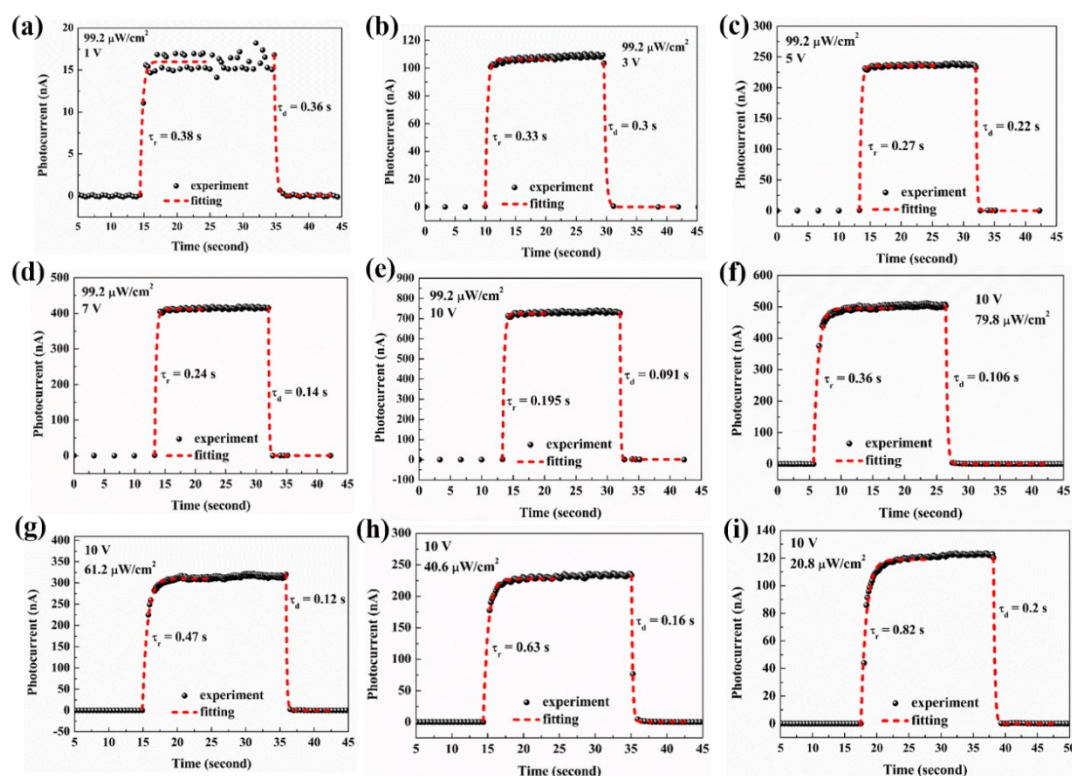

**Fig. S1.** The first-order exponential fitting of one cycle (40 s) under the conditions of different applied voltages and UV light intensities to calculate the rise and decay time for MOS-structured photodiode, working as a UV solar-blind photodetector. The corresponding voltages and UV light intensities are (a) 1 V and 99.2  $\mu\text{W}/\text{cm}^2$ , (b) 3 V and 99.2  $\mu\text{W}/\text{cm}^2$ , (c) 5 V and 99.2  $\mu\text{W}/\text{cm}^2$ , (d) 7 V and 99.2  $\mu\text{W}/\text{cm}^2$ , (e) 10 V and 99.2  $\mu\text{W}/\text{cm}^2$ , (f) 10 V and 79.8  $\mu\text{W}/\text{cm}^2$ , (g) 10 V and 61.2  $\mu\text{W}/\text{cm}^2$ , (h) 10 V and 40.6  $\mu\text{W}/\text{cm}^2$  and (i) 10 V and 20.8  $\mu\text{W}/\text{cm}^2$ , respectively.

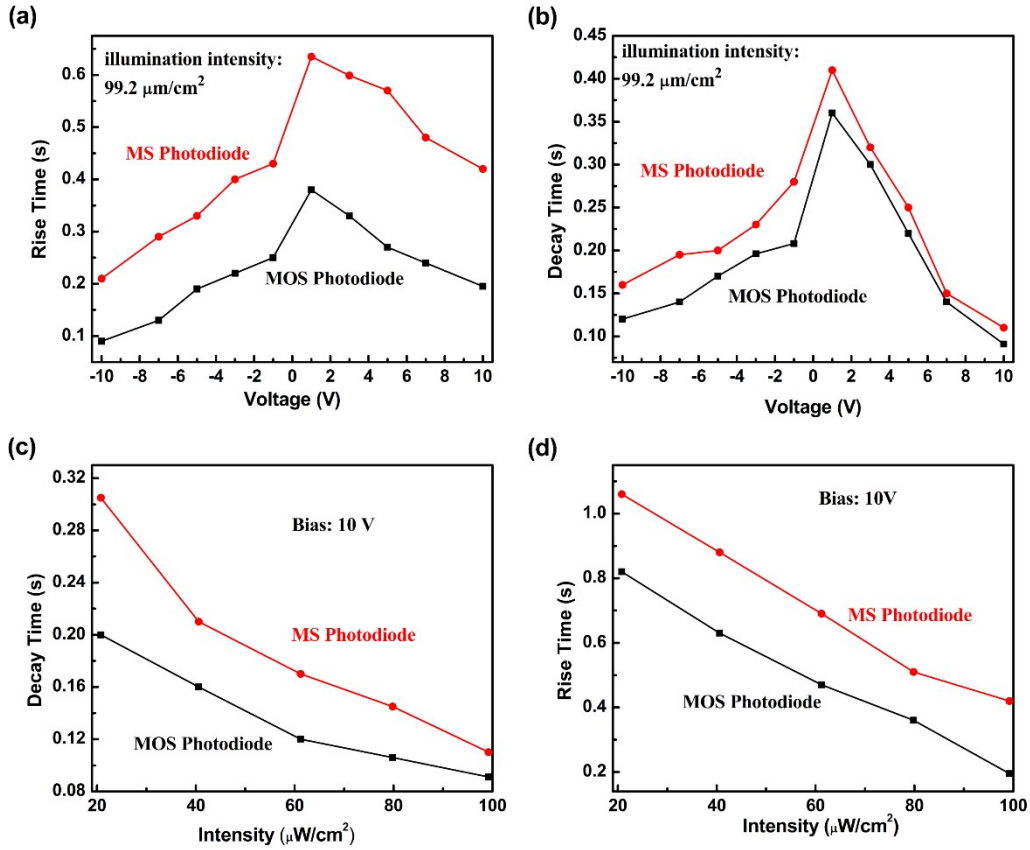

**Fig. S2.** The (a) rise and (b) decay time of the MOS and MS photodetectors under  $99.2 \mu\text{W cm}^{-2}$  at voltages of -10 V, -7 V, -5 V, -3 V, -1 V, 1 V, 3 V, 5 V, 7 V and 10 V. The (c) decay and (d) rise time of the MOS and MS photodetectors at 10 V under illuminations of  $20.8 \mu\text{W cm}^{-2}$ ,  $40.6 \mu\text{W cm}^{-2}$ ,  $61.2 \mu\text{W cm}^{-2}$ ,  $79.8 \mu\text{W cm}^{-2}$  and  $99.2 \mu\text{W cm}^{-2}$ .

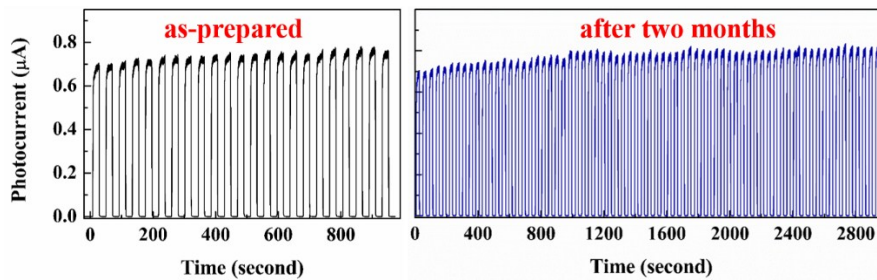

**Fig. S3.** The time-dependent switching photocurrents of the MOS-structured photodiode photodetector, that is measured at the as-prepared device and after two months storage in air at room temperature in our laboratory under the  $99.2 \mu\text{W cm}^{-2}$  254 nm light illumination at applied voltage of 10 V.
